# Supplementary material for: Impact of magnesium:calcium ratio on calcification of the aortic wall
Source: PubMed Central journal article supplement (PMC5453594; doi:10.1371/journal.pone.0178872), 2017-06-01
Supplement: pone.0178872.s001.pdf [file pone.0178872.s001.pdf]

## S1 Table

PLOS ONE

Impact of magnesium:calcium ratio on calcification of the aortic wall

Ricardo Villa-Bellosta

Fig 1C

| PPI Hydrolysis (nmol*g-1*min-1) |           |              |
|---------------------------------|-----------|--------------|
| CaCl2 (-)                       | CaCl2 (+) |              |
| 32,01                           | 4,59      | Experiment 1 |
| 28,62                           | 3,21      |              |
| 34,16                           | 4,34      |              |
| 37,03                           | 5,83      |              |
| 41,18                           | 2,00      |              |
| 44,14                           | 2,97      |              |
| 46,99                           | 10,29     | Experiment 2 |
| 42,92                           | 3,66      |              |
| 46,07                           | 2,83      |              |
| 45,71                           | 2,89      |              |
| 32,68                           | 4,93      |              |
| 26,89                           | 3,58      |              |
| 35,89                           | 5,90      | Experiment 3 |
| 34,70                           | 4,22      |              |
| 39,75                           | 4,11      |              |
| 34,40                           | 12,92     |              |
| 34,33                           | 5,07      |              |
| 38,07                           | 4,88      |              |
| 45,14                           | 6,62      |              |
| 54,36                           | 7,25      |              |

Fig 1D

| ATP Hydrolysis (nmol*g-1*min-1) |           |              |
|---------------------------------|-----------|--------------|
| CaCl2 (-)                       | CaCl2 (+) |              |
| 6319,41                         | 5648,50   | Experiment 1 |
| 5094,59                         | 4676,20   |              |
| 4198,71                         | 3895,82   |              |
| 2999,28                         | 4353,04   |              |
| 3745,49                         | 4795,16   |              |
| 2908,54                         | 3044,45   |              |
| 3494,82                         | 3261,11   | Experiment 2 |
| 3757,10                         | 3032,69   |              |
| 3173,97                         | 3309,29   |              |
| 4282,95                         | 4170,05   |              |
| 3918,84                         | 3464,39   |              |
| 4457,35                         | 3329,37   |              |
| 3413,78                         | 3186,35   | Experiment 3 |
| 3692,22                         | 3522,76   |              |
| 3910,97                         | 4068,00   |              |
| 4176,57                         | 3230,96   |              |
| 4394,20                         | 3679,71   |              |
| 4193,37                         | 3114,39   |              |
| 4005,56                         | 4092,10   |              |
| 3878,21                         | 3626,59   |              |
