# Supplementary material for: Impact of magnesium:calcium ratio on calcification of the aortic wall
Source: PubMed Central journal article supplement (PMC5453594; doi:10.1371/journal.pone.0178872), 2017-06-01
Supplement: pone.0178872.s002.pdf [file pone.0178872.s002.pdf]

**S2 Table****PLOS ONE****Impact of magnesium:calcium ratio on calcification of the aortic wall****Ricardo Villa-Bellota****Fig 2A****PPI hydrolysis % of Vmax****[MgCl<sub>2</sub>]  
(mmol/L)**

Experiment 1

|               |        |       |        |       |       |       |
|---------------|--------|-------|--------|-------|-------|-------|
| <b>0</b>      | 12,78  | 17,07 | 15,86  | 21,03 | 15,16 | 17,79 |
| <b>0,0625</b> | 19,26  | 13,47 | 17,78  | 17,04 | 14,00 | 18,58 |
| <b>0,125</b>  | 15,46  | 10,86 | 23,35  | 10,82 | 20,93 | 14,15 |
| <b>0,25</b>   | 19,28  | 17,03 | 23,08  | 19,25 | 25,29 | 26,09 |
| <b>0,5</b>    | 27,62  | 47,40 | 37,22  | 58,00 | 42,81 | 75,96 |
| <b>1</b>      | 17,10  | 60,19 | 32,99  | 80,59 | 36,66 | 82,70 |
| <b>2</b>      | 62,34  | 83,80 | 63,75  | 79,37 | 67,13 | 81,12 |
| <b>4</b>      | 102,32 | 68,55 | 119,72 | 90,62 | 95,53 | 77,27 |

Experiment 2

|              |       |        |        |        |
|--------------|-------|--------|--------|--------|
| <b>0</b>     | 11,56 | 14,13  | 13,94  | 16,54  |
| <b>0,125</b> | 15,06 | 17,97  | 17,64  | 20,53  |
| <b>0,25</b>  | 23,72 | 16,06  | 29,09  | 17,19  |
| <b>0,5</b>   | 23,88 | 38,76  | 28,24  | 43,31  |
| <b>1</b>     | 64,10 | 55,33  | 70,07  | 58,02  |
| <b>2</b>     | 64,08 | 75,44  | 71,17  | 70,03  |
| <b>4</b>     | 99,40 | 101,25 | 117,17 | 90,97  |
| <b>8</b>     | 84,30 | 126,54 | 100,37 | 104,45 |

Experiment 3

|              |        |        |       |
|--------------|--------|--------|-------|
| <b>0</b>     | 26,68  | 23,14  | 24,43 |
| <b>0,125</b> | 18,89  | 25,11  | 25,88 |
| <b>0,25</b>  | 19,88  | 34,83  | 32,75 |
| <b>0,5</b>   | 50,88  | 66,86  | 56,73 |
| <b>1</b>     | 64,00  | 87,85  | 81,16 |
| <b>2</b>     | 136,89 | 142,84 | 95,99 |
| <b>4</b>     | 138,96 | 123,39 | 91,26 |
| <b>8</b>     | 157,40 | 119,29 | 81,60 |
