# Supplementary material for: Impact of magnesium:calcium ratio on calcification of the aortic wall
Source: PubMed Central journal article supplement (PMC5453594; doi:10.1371/journal.pone.0178872), 2017-06-01
Supplement: pone.0178872.s003.pdf [file pone.0178872.s003.pdf]

## S3 Table

PLOS ONE

Impact of magnesium:calcium ratio on calcification of the aortic wall

Ricardo Villa-Bellota

Fig 2B

### PPI hydrolysis relative

[CaCl<sub>2</sub>]  
(mmol/L)

|        | Experiment 1 |      |      |
|--------|--------------|------|------|
| 0,0000 | 1,19         | 0,82 | 0,99 |
| 0,0625 | 0,48         | 0,58 | 0,54 |
| 0,1250 | 0,34         | 0,28 | 0,31 |
| 0,2500 | 0,16         | 0,21 | 0,22 |
| 0,5000 | 0,15         | 0,11 | 0,13 |
| 1,0000 | 0,11         | 0,09 | 0,11 |
| 2,0000 | 0,08         | 0,03 | 0,11 |
| 4,0000 | 0,08         | 0,06 | 0,08 |

|        | Experiment 2 |      |      |
|--------|--------------|------|------|
| 0,0000 | 0,90         | 1,01 | 1,07 |
| 0,0625 | 0,73         | 0,38 | 0,53 |
| 0,1250 | 0,35         | 0,28 | 0,33 |
| 0,2500 | 0,34         | 0,16 | 0,22 |
| 0,5000 | 0,11         | 0,13 | 0,13 |
| 1,0000 | 0,15         | 0,09 | 0,12 |
| 2,0000 | 0,21         | 0,11 | 0,13 |
| 4,0000 | 0,06         | 0,11 | 0,08 |
