# Supplementary material for: Impact of magnesium:calcium ratio on calcification of the aortic wall
Source: PubMed Central journal article supplement (PMC5453594; doi:10.1371/journal.pone.0178872), 2017-06-01
Supplement: pone.0178872.s004.pdf [file pone.0178872.s004.pdf]

**S4 Table****PLOS ONE****Impact of magnesium:calcium ratio on calcification of the aortic wall****Ricardo Villa-Bellota****Fig 4B****% of Total CPM**

| Mg(+)        | Ca(+) | Mg(-) | Ca(+) | Mg(+) | Ca(-) | Mg(-) | Ca(-) |     |
|--------------|-------|-------|-------|-------|-------|-------|-------|-----|
| Experiment 1 |       |       |       |       |       |       |       |     |
| 36,32        |       | 28,43 |       | 28,11 |       | 88,41 |       | ATP |
| 25,97        |       | 31,83 |       | 37,14 |       | 91,06 |       |     |
| 25,94        |       | 38,80 |       | 26,22 |       | 85,69 |       |     |
| 10,29        |       | 10,91 |       | 14,97 |       | 3,72  |       | ADP |
| 11,63        |       | 13,45 |       | 12,30 |       | 3,94  |       |     |
| 10,57        |       | 12,41 |       | 13,00 |       | 3,59  |       |     |
| 43,64        |       | 46,84 |       | 45,95 |       | 4,05  |       | AMP |
| 44,08        |       | 47,11 |       | 44,41 |       | 4,10  |       |     |
| 48,39        |       | 47,64 |       | 47,19 |       | 4,16  |       |     |
| 9,75         |       | 13,83 |       | 10,97 |       | 3,82  |       | Pi  |
| 18,32        |       | 7,62  |       | 6,15  |       | 0,90  |       |     |
| 15,10        |       | 1,15  |       | 13,59 |       | 6,56  |       |     |

|              |  |       |  |       |  |       |  |     |
|--------------|--|-------|--|-------|--|-------|--|-----|
| Experiment 2 |  |       |  |       |  |       |  |     |
| 24,64        |  | 37,96 |  | 24,91 |  | 81,41 |  | ATP |
| 24,74        |  | 30,46 |  | 34,32 |  | 89,61 |  |     |
| 34,51        |  | 27,16 |  | 25,75 |  | 83,98 |  |     |
| 10,19        |  | 11,19 |  | 14,02 |  | 3,20  |  | ADP |
| 9,58         |  | 10,64 |  | 10,24 |  | 3,01  |  |     |
| 10,80        |  | 11,74 |  | 13,80 |  | 3,39  |  |     |
| 44,12        |  | 46,66 |  | 47,87 |  | 4,82  |  | AMP |
| 44,52        |  | 47,55 |  | 49,97 |  | 4,14  |  |     |
| 45,96        |  | 54,46 |  | 48,35 |  | 4,50  |  |     |
| 21,05        |  | 4,19  |  | 13,19 |  | 10,57 |  | Pi  |
| 21,16        |  | 11,36 |  | 5,47  |  | 3,25  |  |     |
| 8,73         |  | 6,64  |  | 12,10 |  | 8,12  |  |     |

|              |  |       |  |       |  |       |  |     |
|--------------|--|-------|--|-------|--|-------|--|-----|
| Experiment 3 |  |       |  |       |  |       |  |     |
| 34,14        |  | 29,70 |  | 28,46 |  | 89,83 |  | ATP |
| 23,50        |  | 29,08 |  | 34,51 |  | 85,13 |  |     |
| 27,24        |  | 41,64 |  | 27,53 |  | 89,98 |  |     |
| 11,06        |  | 10,73 |  | 13,69 |  | 3,65  |  | ADP |
| 9,51         |  | 11,37 |  | 11,70 |  | 3,23  |  |     |
| 11,51        |  | 11,08 |  | 14,25 |  | 3,80  |  |     |
| 44,80        |  | 49,00 |  | 50,36 |  | 4,63  |  | AMP |
| 44,52        |  | 50,84 |  | 43,42 |  | 3,83  |  |     |
| 52,27        |  | 47,16 |  | 52,38 |  | 4,45  |  |     |
| 10,00        |  | 10,57 |  | 7,48  |  | 1,89  |  | Pi  |
| 22,47        |  | 8,71  |  | 10,37 |  | 7,81  |  |     |
| 8,99         |  | 0,11  |  | 5,83  |  | 1,78  |  |     |
