# Supplementary material for: Impact of magnesium:calcium ratio on calcification of the aortic wall
Source: PubMed Central journal article supplement (PMC5453594; doi:10.1371/journal.pone.0178872), 2017-06-01
Supplement: pone.0178872.s005.pdf [file pone.0178872.s005.pdf]

## S5 Table

PLOS ONE

Impact of magnesium:calcium ratio on calcification of the aortic wall

Ricardo Villa-Bellota

Fig 5

| <b>Ca<sup>2+</sup> Deposition micromol/g</b> |       |       |                                  |
|----------------------------------------------|-------|-------|----------------------------------|
| 7,76                                         | 23,23 | 43,59 | <b>Experiment 1</b>              |
| 21,28                                        | 33,82 | 40,64 |                                  |
| 9,36                                         | 16,07 | 23,70 |                                  |
| 13,59                                        | 15,71 | 45,18 |                                  |
| 26,10                                        | 28,66 | 45,30 |                                  |
| 7,73                                         | 23,69 | 43,39 |                                  |
| 21,31                                        | 35,02 | 41,64 |                                  |
| 9,43                                         | 15,89 | 23,28 | <b>Experiment 2</b>              |
| 13,46                                        | 17,05 | 44,94 |                                  |
| 26,37                                        | 27,66 | 46,49 |                                  |
| 16,93                                        | 23,68 | 42,52 |                                  |
| 9,40                                         | 26,18 | 45,72 |                                  |
| 15,64                                        | 24,76 | 42,12 |                                  |
| 13,52                                        | 25,77 | 39,82 |                                  |
| 0,50                                         | 0,75  | 1,50  | <b>MgCl<sub>2</sub> (mmol/L)</b> |
| 1,50                                         | 1,50  | 1,50  | <b>CaCl<sub>2</sub> (mmol/L)</b> |
